# Supplementary material for: Paralytic ileus in a patient on clozapine therapy showing an inverted clozapine/norclozapine ratio after switching valproic acid to carbamazepine: a case report
Source: PubMed Central journal article supplement (PMC11143807; doi:10.1177/20451253241255487), 2024-05-31
Supplement: sj-pdf-1-tpp-10.1177_20451253241255487.pdf [file sj-pdf-1-tpp-10.1177_20451253241255487.pdf]

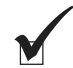

| Topic                               | Item | Checklist item description                                                                                                                | Reported on Line                                                           |
|-------------------------------------|------|-------------------------------------------------------------------------------------------------------------------------------------------|----------------------------------------------------------------------------|
| <b>Title</b>                        | 1    | The diagnosis or intervention of primary focus followed by the words "case report" . . . . .                                              | <u>p2, line 7</u>                                                          |
| <b>Key Words</b>                    | 2    | 2 to 5 key words that identify diagnoses or interventions in this case report, including "case report" . . .                              | <u>p3, line 12</u>                                                         |
| <b>Abstract<br/>(no references)</b> | 3a   | Introduction: What is unique about this case and what does it add to the scientific literature? . . . . .                                 | <u>p2, line 39</u>                                                         |
|                                     | 3b   | Main symptoms and/or important clinical findings . . . . .                                                                                | <u>p2</u>                                                                  |
|                                     | 3c   | The main diagnoses, therapeutic interventions, and outcomes . . . . .                                                                     | <u>p2, lines 40-59</u>                                                     |
|                                     | 3d   | Conclusion—What is the main "take-away" lesson(s) from this case? . . . . .                                                               | <u>p3, line 6</u>                                                          |
| <b>Introduction</b>                 | 4    | One or two paragraphs summarizing why this case is unique ( <b>may include references</b> ) . . . . .                                     | <u>p3, lines 17-34</u>                                                     |
| <b>Patient Information</b>          | 5a   | De-identified patient specific information. . . . .                                                                                       | <u>p3, p4</u>                                                              |
|                                     | 5b   | Primary concerns and symptoms of the patient. . . . .                                                                                     | <u>p3, lines 43-53</u>                                                     |
|                                     | 5c   | Medical, family, and psycho-social history including relevant genetic information . . . . .                                               | <u>p3,line 45 - p4,line27</u>                                              |
|                                     | 5d   | Relevant past interventions with outcomes . . . . .                                                                                       | <u>p3,line55 - p4,line 23</u>                                              |
| <b>Clinical Findings</b>            | 6    | Describe significant physical examination (PE) and important clinical findings. . . . .                                                   | <u>p4, lines 16-27</u>                                                     |
| <b>Timeline</b>                     | 7    | Historical and current information from this episode of care organized as a timeline . . . . .                                            | <u>text p3, p4 + figure 1</u>                                              |
| <b>Diagnostic<br/>Assessment</b>    | 8a   | Diagnostic testing (such as PE, laboratory testing, imaging, surveys). . . . .                                                            | <u>p4,lines 11-16 and 24-26</u>                                            |
|                                     | 8b   | Diagnostic challenges (such as access to testing, financial, or cultural) . . . . .                                                       | <u>N/A</u>                                                                 |
|                                     | 8c   | Diagnosis (including other diagnoses considered) . . . . .                                                                                | <u>p3,lines 43-53 and p4,16-22</u>                                         |
|                                     | 8d   | Prognosis (such as staging in oncology) where applicable . . . . .                                                                        | <u>N/A</u>                                                                 |
| <b>Therapeutic<br/>Intervention</b> | 9a   | Types of therapeutic intervention (such as pharmacologic, surgical, preventive, self-care) . . . . .                                      | <u>p4, lines 28-29</u>                                                     |
|                                     | 9b   | Administration of therapeutic intervention (such as dosage, strength, duration) . . . . .                                                 | <u>p4, lines 29-40 and 57-59</u>                                           |
|                                     | 9c   | Changes in therapeutic intervention (with rationale) . . . . .                                                                            | <u>N/A</u>                                                                 |
| <b>Follow-up and<br/>Outcomes</b>   | 10a  | Clinician and patient-assessed outcomes (if available) . . . . .                                                                          | <u>p4,41-46+p4,line 54-p5,line10</u>                                       |
|                                     | 10b  | Important follow-up diagnostic and other test results . . . . .                                                                           | <u>p4,lines 47-53+pg 5, lines 8-9</u>                                      |
|                                     | 10c  | Intervention adherence and tolerability (How was this assessed?) . . . . .                                                                | <u>p4, lines 38-39</u>                                                     |
|                                     | 10d  | Adverse and unanticipated events . . . . .                                                                                                | <u>p4, lines 41-46</u>                                                     |
| <b>Discussion</b>                   | 11a  | A scientific discussion of the strengths AND limitations associated with this case report . . . . .                                       | <u>p7, line 46-51</u>                                                      |
|                                     | 11b  | Discussion of the relevant medical literature <b>with references</b> . . . . .                                                            | <u>p5, p6, p7</u>                                                          |
|                                     | 11c  | The scientific rationale for any conclusions (including assessment of possible causes) . . . . .                                          | <u>p7, lines15-29 + lines 39-44</u>                                        |
|                                     | 11d  | The primary "take-away" lessons of this case report (without references) in a one paragraph conclusion . . . . .                          | <u>page 8</u>                                                              |
| <b>Patient Perspective</b>          | 12   | The patient should share their perspective in one to two paragraphs on the treatment(s) they received . . . . .                           | <u>N/A</u>                                                                 |
| <b>Informed Consent</b>             | 13   | Did the <del>patient</del> <u>patient</u> give informed consent? Please provide if requested <u>.the curator of the patient</u> . . . . . | <u>Yes <input checked="" type="checkbox"/> No <input type="checkbox"/></u> |
