# Supplementary material for: Paralytic ileus in a patient on clozapine therapy showing an inverted clozapine/norclozapine ratio after switching valproic acid to carbamazepine: a case report
Source: PubMed Central journal article supplement (PMC11143807; doi:10.1177/20451253241255487), 2024-05-31
Supplement: sj-pdf-2-tpp-10.1177_20451253241255487.pdf [file sj-pdf-2-tpp-10.1177_20451253241255487.pdf]

**Supplementary table 1. Naranjo Adverse Drug Reaction Probability Scale for clozapine and carbamazepine**

|                                                                                                         | yes | no | do not know | clozapine |          | carbamazepine |          |
|---------------------------------------------------------------------------------------------------------|-----|----|-------------|-----------|----------|---------------|----------|
| Are there previous conclusive reports on this reaction?                                                 | 1   | 0  | 0           | yes       | 1        | no            | 0        |
| Did the adverse event appear after the suspected drug was administered?                                 | 2   | -1 | 0           | yes       | 2        | yes           | 2        |
| Did the adverse event improve when the drug was discontinued or a specific antagonist was administered? | 1   | 0  | 0           | N/A       | 0        | N/A           | 0        |
| Did the adverse event reappear when the drug was readministered?                                        | 2   | -1 | 0           | N/A       | 0        | N/A           | 0        |
| Are there alternative causes that could on their own have caused this reaction?                         | -1  | 2  | 0           | no        | 2        | yes           | -1       |
| Did the reaction reappear when a placebo was given?                                                     | -1  | 1  | 0           | N/A       | 0        | N/A           | 0        |
| Was the drug detected in blood or other fluids in concentrations known to be toxic?                     | 1   | 0  | 0           | no        | 0        | no            | 0        |
| Was the reaction more severe when the dose was increased or less severe when the dose was decreased?    | 1   | 0  | 0           | no        | 0        | no            | 0        |
| Did the patient have a similar reaction to the same or similar drugs in any previous exposure?          | 1   | 0  | 0           | yes       | 1        | no            | 0        |
| Was the adverse event confirmed by any objective evidence?                                              | 1   | 0  | 0           | yes       | 1        | yes           | 1        |
| <b>Total Score</b>                                                                                      |     |    |             |           | <b>7</b> |               | <b>2</b> |
